# Supplementary material
Source: publisher site journal article supplement (https://kjim.org/upload/media/kjim-2024-015-Supplementary-Table-1.pdf)
Supplement: Supplementary file 1 [file kjim-2024-015-Supplementary-Table-1.pdf]

Supplementary Table 1. Baseline characteristics

| Variable                             | Estimated pulse wave velocity (m/s) |                                          |                                           |                                           | p value |
|--------------------------------------|-------------------------------------|------------------------------------------|-------------------------------------------|-------------------------------------------|---------|
|                                      | Overall<br>(n= 9,722)               | First tertile (4.53–7.67)<br>(n = 2,069) | Second tertile (7.68–9.34)<br>(n = 2,056) | Third tertile (9.35–14.86)<br>(n = 2,061) |         |
| Age (yr)                             | 52.05 ± 8.87                        | 44.20 ± 3.65 <sup>a,b</sup>              | 50.69 ± 6.19 <sup>c</sup>                 | 61.26 ± 6.01                              | < 0.001 |
| Male, sex                            | 4,620 (47.5)                        | 1,413 (43.6)                             | 1,729 (53.3)                              | 1,478 (45.6)                              | < 0.001 |
| Body mass index (kg/m <sup>2</sup> ) | 24.54 ± 3.14                        | 24.04 ± 2.85 <sup>a,b</sup>              | 24.89 ± 3.15 <sup>c</sup>                 | 24.70 ± 3.34                              | < 0.001 |
| Waist circumference (cm)             | 82.89 ± 8.80                        | 79.59 ± 8.26 <sup>a,b</sup>              | 83.74 ± 8.36 <sup>c</sup>                 | 85.34 ± 8.78                              | < 0.001 |
| Income level                         |                                     |                                          |                                           |                                           | < 0.001 |
| ≥ Median                             | 4,714 (49.4)                        | 2,280 (71.2)                             | 1,650 (51.9)                              | 784 (24.8)                                |         |
| Education                            |                                     |                                          |                                           |                                           | < 0.001 |
| Lower than middle school             | 3,171 (32.9)                        | 364 (11.3)                               | 928 (28.8)                                | 1,879 (58.8)                              |         |
| Middle school                        | 2,231 (23.1)                        | 775 (24.0)                               | 842 (26.1)                                | 614 (19.2)                                |         |
| High school                          | 2,961 (30.7)                        | 1,452 (45.0)                             | 1,008 (31.3)                              | 501 (15.7)                                |         |
| University and college               | 1,282 (13.3)                        | 636 (19.7)                               | 444 (13.8)                                | 202 (6.3)                                 |         |
| Smoking status                       |                                     |                                          |                                           |                                           | < 0.001 |
| Current-smoker                       | 2,478 (25.8)                        | 867 (27.1)                               | 891 (27.8)                                | 720 (22.6)                                |         |
| Ex-smoker                            | 1,490 (15.5)                        | 405 (12.7)                               | 554 (17.3)                                | 531 (16.7)                                |         |
| Never-smoker                         | 5,627 (58.6)                        | 1,927 (60.2)                             | 1,762 (54.9)                              | 1,938 (60.8)                              |         |
| Alcohol drinking                     |                                     |                                          |                                           |                                           | < 0.001 |
| Current-drinker                      | 4,580 (47.5)                        | 1,644 (51.1)                             | 1,629 (50.7)                              | 1,307 (40.8)                              |         |
| Ex-drinker                           | 624 (6.5)                           | 170 (5.3)                                | 212 (6.6)                                 | 242 (7.6)                                 |         |
| Never-drinker                        | 4,433 (46.0)                        | 1,405 (43.6)                             | 1,375 (42.8)                              | 1,653 (51.6)                              |         |
| Physical activity, METs-hour/wk      | 171.02 ± 104.22                     | 150.76 ± 91.03 <sup>a,b</sup>            | 170.71 ± 103.60 <sup>c</sup>              | 191.82 ± 112.93                           | < 0.001 |
| Systolic blood pressure (mmHg)       | 124.40 ± 18.70                      | 108.85 ± 9.50 <sup>a,b</sup>             | 123.74 ± 11.64 <sup>c</sup>               | 140.64 ± 17.82                            | < 0.001 |
| Diastolic blood pressure (mmHg)      | 81.66 ± 11.79                       | 72.43 ± 7.60 <sup>a,b</sup>              | 83.04 ± 9.24 <sup>c</sup>                 | 89.52 ± 11.17                             | < 0.001 |
| Medical history                      |                                     |                                          |                                           |                                           |         |
| Hypertension                         | 1,078 (11.1)                        | 37 (1.1)                                 | 289 (8.9)                                 | 752 (23.3)                                | < 0.001 |
| Diabetes mellitus                    | 221 (2.3)                           | 39 (1.2)                                 | 73 (2.3)                                  | 109 (3.4)                                 | < 0.001 |
| Dyslipidemia                         | 54 (0.6)                            | 9 (0.3)                                  | 17 (0.5)                                  | 28 (0.9)                                  | 0.006   |
| Chronic kidney disease               | 282 (2.9)                           | 76 (2.3)                                 | 98 (3.0)                                  | 108 (3.3)                                 | 0.052   |
| Laboratory data                      |                                     |                                          |                                           |                                           |         |
| eGFR (mL/min/1.73 m <sup>2</sup> )   | 89.7 (20.3)                         | 92.8 ± 20.0 <sup>a,b</sup>               | 89.5 ± 20.1 <sup>c</sup>                  | 87.0 ± 20.3                               | < 0.001 |

Supplementary Table 1. Continued

| Variable                     | Estimated pulse wave velocity (m/s) |                                          |                                           |                                           | p value              |
|------------------------------|-------------------------------------|------------------------------------------|-------------------------------------------|-------------------------------------------|----------------------|
|                              | Overall<br>(n= 9,722)               | First tertile (4.53–7.67)<br>(n = 2,069) | Second tertile (7.68–9.34)<br>(n = 2,056) | Third tertile (9.35–14.86)<br>(n = 2,061) |                      |
| Fasting glucose (mg/dL)      | 82 (77–90)                          | 82 (77–87) <sup>a,b</sup>                | 83 (78–91)                                | 83 (78–92)                                | < 0.001 <sup>d</sup> |
| Hemoglobin A1c (%)           | 5.6 (5.3–5.9)                       | 5.5 (5.3–5.7) <sup>a,b</sup>             | 5.6 (5.4–5.9) <sup>c</sup>                | 5.7 (5.5–6.0)                             | < 0.001 <sup>d</sup> |
| Total cholesterol (mg/dL)    | 189 (167–214)                       | 182 (162–207) <sup>a,b</sup>             | 192 (169–217)                             | 192 (169–216)                             | < 0.001 <sup>d</sup> |
| Triglyceride (mg/dL)         | 134 (99–188)                        | 118 (90–164) <sup>a,b</sup>              | 141 (103–199) <sup>c</sup>                | 146 (110–200)                             | < 0.001 <sup>d</sup> |
| HDL cholesterol (mg/dL)      | 44 (38–50)                          | 44 (38–50)                               | 43 (37–50)                                | 43 (37–50)                                | 0.034 <sup>d</sup>   |
| LDL cholesterol (mg/dL)      | 121 (100–143)                       | 117 (97–139) <sup>a,b</sup>              | 123 (102–145)                             | 124 (102–146)                             | < 0.001 <sup>d</sup> |
| Metabolic syndrome component |                                     |                                          |                                           |                                           | < 0.001              |
| Score 0                      | 1,588 (16.3)                        | 938 (28.9)                               | 467 (14.4)                                | 183 (5.7)                                 |                      |
| Score 1                      | 2,695 (27.7)                        | 1,237 (38.2)                             | 808 (24.9)                                | 650 (20.1)                                |                      |
| Score 2                      | 2,501 (25.7)                        | 752 (23.2)                               | 914 (28.2)                                | 835 (25.8)                                |                      |
| Score 3                      | 1,821 (18.7)                        | 264 (8.1)                                | 689 (21.2)                                | 868 (26.8)                                |                      |
| Score 4                      | 946 (9.7)                           | 47 (1.5)                                 | 317 (9.8)                                 | 582 (18.0)                                |                      |
| Score 5                      | 171 (1.8)                           | 3 (0.1)                                  | 48 (1.5)                                  | 120 (3.7)                                 |                      |

Categorical variables were presented as number (%) and continuous variables were presented as mean ± standard deviation or median (interquartile range) as appropriate.

MET, metabolic equivalent of task; eGFR, estimated glomerular filtration rate; HDL, high-density lipoprotein; LDL, low-density lipoprotein.

<sup>a</sup>)Post hoc *p*: first tertile vs. second tertile, statistically significant (*p* < 0.05).

<sup>b</sup>)Post hoc *p*: first tertile vs. third tertile, statistically significant (*p* < 0.05).

<sup>c</sup>)Post hoc *p*: second tertile vs. third tertile, statistically significant (*p* < 0.05).

<sup>d</sup>)Assessed by nonparametric test.
